# Supplementary material for: A phase II study of the oral JAK1/JAK2 inhibitor ruxolitinib in advanced relapsed/refractory Hodgkin lymphoma
Source: PubMed Central journal article supplement — Haematologica. 2018 Jan 19;103(5):840–8. doi: 10.3324/haematol.2017.180554 (PMC5927969; doi:10.3324/haematol.2017.180554), 2018-05
Supplement: 2017.180554.VAN_DEN_NESTE_SUPPL.pdf [file 2017.180554.VAN_DEN_NESTE_SUPPL.pdf]

## A phase II study of the oral JAK1/JAK2 inhibitor ruxolitinib in advanced relapsed/refractory Hodgkin lymphoma

Eric Van Den Neste,<sup>1</sup> Marc André,<sup>2</sup> Thomas Gastinne,<sup>3</sup> Aspasia Stamatoullas,<sup>4</sup> Corinne Haioun,<sup>5</sup> Amine Belhabri,<sup>6</sup> Oumedaly Reman,<sup>7</sup> Olivier Casasnovas,<sup>8</sup> Hervé Ghesquieres,<sup>9</sup> Gregor Verhoef,<sup>10</sup> Marie-José Claessen,<sup>11</sup> Hélène A. Poirel,<sup>12</sup> Marie-Christine Copin,<sup>13</sup> Romain Dubois,<sup>13</sup> Peter Vandenberghe,<sup>14</sup> Ioanna-Andrea Stoian,<sup>15</sup> Anne S. Cottreau,<sup>16</sup> Sarah Bailly,<sup>1</sup> Laurent Knoop<sup>17</sup> and Franck Morschhauser<sup>18</sup>

<sup>1</sup>Department of Hematology, Cliniques Universitaires Saint-Luc, UCL Brussels, Belgium; <sup>2</sup>Hematology Department, CHU UCL Namur, Yvoir, Belgium; <sup>3</sup>Hematology, CHU Nantes, France; <sup>4</sup>Clinical Hematology, Centre Henri Becquerel, Rouen, France; <sup>5</sup>Lymphoid Malignancies Unit, AP-HP, Groupe Hospitalier Mondor, Créteil, France; <sup>6</sup>Onco-hematology, Centre Leon Berard, University Claude Bernard Lyon 1, France; <sup>7</sup>Hematology, Centre Hospitalier Universitaire, Caen, France; <sup>8</sup>Hematology Department, Hopital Le Bocage, CHU Dijon, France; <sup>9</sup>Hospices Civils de Lyon, Université Claude Bernard, Centre Hospitalier Lyon-Sud, Pierre Bénite, France; <sup>10</sup>Department of Hematology, University Hospitals Leuven, Belgium; <sup>11</sup>Erasmus MC, Rotterdam, the Netherlands; <sup>12</sup>Center for Human Genetics, Cliniques universitaires Saint-Luc, Université Catholique de Louvain, Brussels, Belgium; <sup>13</sup>CHRU de Lille, France; <sup>14</sup>Center for Human Genetics, Katholieke Universiteit - Leuven, Belgium; <sup>15</sup>Nuclear Medicine, Cliniques Universitaires Saint-Luc, UCL Brussels, Belgium; <sup>16</sup>Nuclear Medicine, Hôpital Tenon, Paris, France; <sup>17</sup>Cliniques Universitaires Saint-Luc and de Duve Institute, Université Catholique de Louvain, Brussels, Belgium and <sup>18</sup>CHU Lille, Hematology Department, and Université de Lille, GRITA, France

©2018 Ferrata Storti Foundation. This is an open-access paper. doi:10.3324/haematol.2017.180554

Received: September 12, 2017.

Accepted: January 10, 2018.

Pre-published: January 19, 2018.

Correspondence: franck.morschhauser@chru-lille.fr

Hijak study by E. Van Den Neste *et al*

Supplementary data:

Mandatory dose decreases or interruptions for hematological toxicity:

There are mandatory dose decreases or interruptions for declining platelet count or ANC level while on ruxolitinib therapy. Dosing must be held if platelet count decline below  $25 \times 10^9 /L$ , or if ANC falls below  $0.5 \times 10^9 /L$ . Patients with platelets below  $50 \times 10^9 /L$  and/or ANC below  $0.5 \times 10^9 /L$  should be followed biweekly.

The dose reduction strategy for platelet count is depicted in Table 1 This table takes into account doses that might be present after a prior dose reduction. Ruxolitinib dose will not be adapted to lymphocytes count.

Table 1 : dose reduction strategy for low platelet count

| Platelet count at time of decline | Dosing at the time of platelet decline |           |           |          |
|-----------------------------------|----------------------------------------|-----------|-----------|----------|
|                                   | 20 mg BID                              | 15 mg BID | 10 mg BID | 5 mg BID |
|                                   | Dose that MUST be instituted           |           |           |          |
| $\geq 75 \times 10^9/L$           | No dose reduction required             |           |           |          |
| 50 to $< 75 \times 10^9/L$        | 10 mg BID                              | 10 mg BID | 10 mg BID | 5 mg BID |
| 25 to $< 50 \times 10^9/L$        | 5 mg BID                               | 5 mg BID  | 5 mg BID  | 5 mg BID |
| $< 25 \times 10^9/L$              | MUST stop dosing                       |           |           |          |

Restarting or re-instituting previous dose

Dosing may be restarted following recovery of platelet count and/or ANC to acceptable levels. ANC level recovery to above  $500/\mu L$  but less than  $750/\mu L$  will allow dosing to be restarted at 5 mg BID. ANC level between 750 and  $1000/\mu L$  may restart at 10 mg BID. Increase of ANC above  $1000/\mu L$  will allow a further dose increase to the initial dosing (15 mg BID or 20 mg BID).

Table 2: Restarting or increasing ruxolitinib dose after safety interruptions or dose reductions for low ANC count

| Current ANC level             | Recommendation                                                                                                 |
|-------------------------------|----------------------------------------------------------------------------------------------------------------|
| $< 0.5 \times 10^9/L$         | Continue hold                                                                                                  |
| 0.5 to $< 0.75 \times 10^9/L$ | 5 mg BID for at least one week; if stable, may increase to 10 mg BID                                           |
| 0.75 to $< 1 \times 10^9/L$   | 10 mg BID for at least one week; if stable, may increase to 15 mg BID                                          |
| $\geq 1 \times 10^9/L$        | 15 mg BID. If stable for at least one week, increase to 20 mg BID for patients who were initially at 20 mg BID |

Table 3: Restarting or increasing ruxolitinib dose after safety interruptions or dose reductions for low platelet count

| Current platelet level          | Recommendation                                                                                                 |
|---------------------------------|----------------------------------------------------------------------------------------------------------------|
| < 25 x 10 <sup>9</sup> /L       | Continue hold                                                                                                  |
| 25 to < 50 x 10 <sup>9</sup> /L | 5 mg BID for at least one week; if stable, may increase to 10 mg BID                                           |
| 50 to < 75 x 10 <sup>9</sup> /L | 10 mg BID for at least one week; if stable, may increase to 15 mg BID                                          |
| ≥ 75 x 10 <sup>9</sup> /L       | 15 mg BID. If stable for at least one week, increase to 20 mg BID for patients who were initially at 20 mg BID |

### Rules for permanent discontinuation

If the study drug is interrupted for any reason for more than 4 weeks, dosing may not be restarted. Study drug must be permanently discontinued if the lowest allowed dose (5 mg BID, or 5 mg QD with concomitant CYP3A4 inhibitor) is not tolerated due to the following: platelet count cannot be maintained > 25 x 10<sup>9</sup> /L, ANC cannot be maintained > 0.5 x 10<sup>9</sup> /L. Study drug must also be permanently discontinued due to the following: > grade 3 clinical event after re-challenge with the drug. Exceptions NOT requiring study withdrawal are fatigue, insomnia, obesity, constitutional symptoms (disabling but not life-threatening), salivary gland changes, arthritis, and joint effusion.

### Cytokines

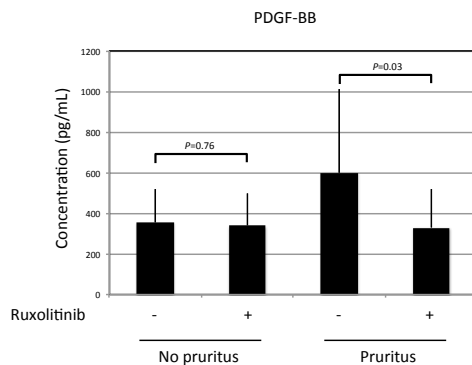

PDGF-BB concentration in patients with (n=8) or without (n=17) pruritus before treatment (-) and after one cycle of ruxolitinib (+).
