# Supplementary material for: A phase II study of the oral JAK1/JAK2 inhibitor ruxolitinib in advanced relapsed/refractory Hodgkin lymphoma
Source: PubMed Central journal article supplement — Haematologica. 2018 Jan 19;103(5):840–8. doi: 10.3324/haematol.2017.180554 (PMC5927969; doi:10.3324/haematol.2017.180554), 2018-05
Supplement: HAEMATOL-2017-180554v3-Van_Den_Neste-01.pdf [file HAEMATOL-2017-180554v3-Van_Den_Neste-01.pdf]

# Safety and efficacy of ruxolitinib in patients with relapsed or refractory Hodgkin's lymphoma (R/R HL)

## JAK1/2 inhibition

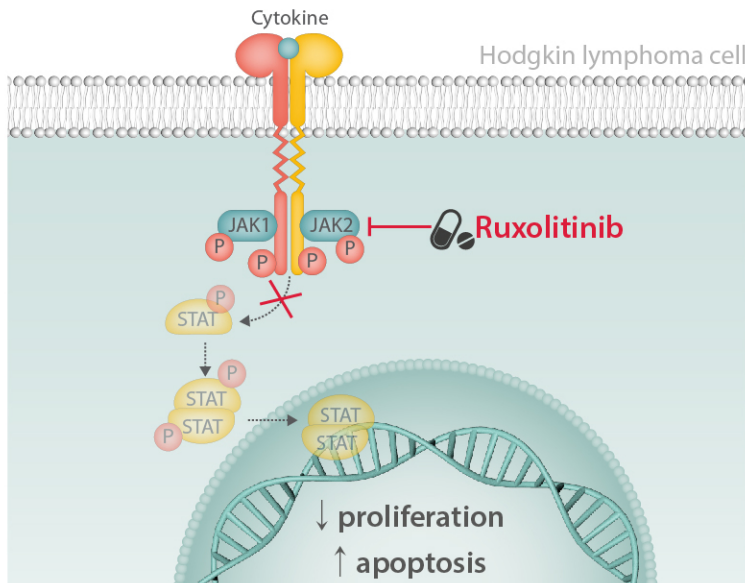

 **33** Patients with R/R HL

 **Ruxolitinib:** • 20 mg if platelet count  $>200 \times 10^9/L$   
• 15 mg if platelet count  $75-200 \times 10^9/L$

Median number of ruxolitinib cycle: 4 (range 1-12)

 **9** 27.3% 6 cycles of ruxolitinib

 **6** 18.2%  $>6$  cycles of ruxolitinib

Median follow-up  17.5 months

## Primary endpoint

- Overall response rate: 3/32 (9.4%; 90%CI: 2.6-22.5%)

## Secondary endpoints

- Best overall response rate: 6/32 (18.8%; 95%CI: 7.2-36.4%)
- Progression-free survival: 3.5 months (95%CI: 1.9-4.6)
- Duration of response: 7.7 months
- Overall survival: 27.1 months (95%CI: 14.4-27.1)
- Adverse events: 40 in 14 (42.4%) patients  
25  $\geq$ Grade 3
